# Supplementary material for: Automatic in situ short-distance deposition of PLGA/PLLA composite nanofibrous membranes for personalized wound dressings
Source: Royal Society of Chemistry journal article supplement (doi:10.1039/d3nr06376c), 2024-01-01
Supplement: d3nr06376c5.pdf [file d3nr06376c5.pdf]

**Supporting Information**

***In situ* automatic deposition of PLGA/PLLA composite  
nanofibrous membranes for personalized wound dressing**

Yuzhi Liu<sup>a,#</sup>, Bihan Xia<sup>a,#</sup>, Rui Zhao<sup>a,c</sup>, Mei Qin<sup>b</sup>, Xuan Weng<sup>b</sup>, Zhi Zeng<sup>b,\*</sup>, Kai  
Deng<sup>a,\*</sup>, Hai Jiang<sup>b,\*</sup>

<sup>a</sup>Department of Gastroenterology and Hepatology, West China Hospital, Sichuan University, Chengdu, 610041, China

<sup>b</sup>School of Mechanical and Electrical Engineering, University of Electronic Science and Technology of China, Chengdu, 611731, China

<sup>c</sup>Department of Endoscopy, Sichuan Clinical Research Center for Cancer, Sichuan Cancer Hospital & Institute, Sichuan Cancer Center, Affiliated Cancer Hospital of University of Electronic Science and Technology of China, Chengdu, 610042, China.

<sup>#</sup>These authors contributed equally to this work.

\*Corresponding author

E-mail address: zhizeng@uestc.edu.cn; baoyu514@163.com; haijiang@uestc.edu.cn

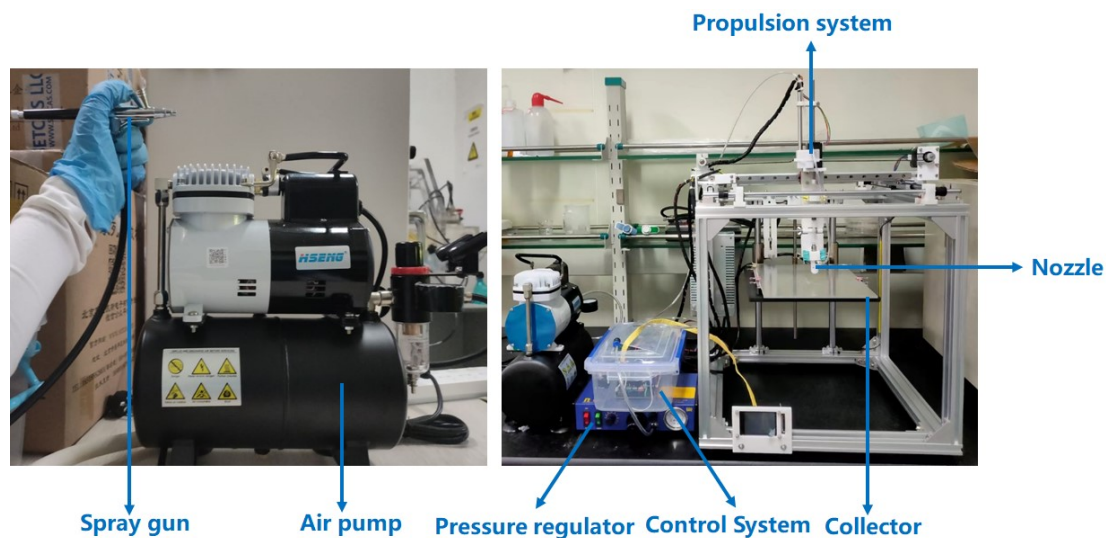

**Fig. S1** Pictures showing (a) the commercial manual deposition device and (b) home designed automatic *in situ* deposition device.

**Table S1** Table of orthogonal experiments on the spinning distance of 10 cm

| Experiment # | Factors<br>(wt% of PLGA) | A             | B             | C                   |
|--------------|--------------------------|---------------|---------------|---------------------|
|              |                          | (wt% of PLGA) | (wt% of PLLA) | (Air pressure, kPa) |
| a            | 6                        | 6             | 1             | 200                 |
| b            | 6                        | 6             | 2             | 230                 |
| c            | 6                        | 6             | 3             | 260                 |
| d            | 8                        | 8             | 1             | 230                 |
| e            | 8                        | 8             | 2             | 260                 |
| f            | 8                        | 8             | 3             | 200                 |
| g            | 10                       | 10            | 1             | 260                 |
| h            | 10                       | 10            | 2             | 200                 |
| i            | 10                       | 10            | 3             | 230                 |

**Table S2** Table of orthogonal experiments on the spinning distance of 5 cm

| Experiment # | Factors<br>(wt% of PLGA) | A             | B             | C                   |
|--------------|--------------------------|---------------|---------------|---------------------|
|              |                          | (wt% of PLGA) | (wt% of PLLA) | (Air pressure, kPa) |
| a            | 5                        | 5             | 1             | 160                 |
| b            | 5                        | 5             | 2             | 180                 |
| c            | 5                        | 5             | 3             | 200                 |
| d            | 7                        | 7             | 1             | 180                 |
| e            | 7                        | 7             | 2             | 200                 |
| f            | 7                        | 7             | 3             | 160                 |
| g            | 9                        | 9             | 1             | 200                 |
| h            | 9                        | 9             | 2             | 160                 |
| i            | 9                        | 9             | 3             | 180                 |

**Table S3** Table of orthogonal experiments on the spinning distance of 2 cm

| Experiment # | Factors<br>A<br>(wt% of PLGA) | B<br>(wt% of PLLA) | C<br>(Air pressure, kPa) |
|--------------|-------------------------------|--------------------|--------------------------|
| a            | 4                             | 1                  | 100                      |
| b            | 4                             | 2                  | 125                      |
| c            | 4                             | 3                  | 150                      |
| d            | 5                             | 1                  | 125                      |
| e            | 5                             | 2                  | 150                      |
| f            | 5                             | 3                  | 100                      |
| g            | 6                             | 1                  | 150                      |
| h            | 6                             | 2                  | 100                      |
| i            | 6                             | 3                  | 125                      |

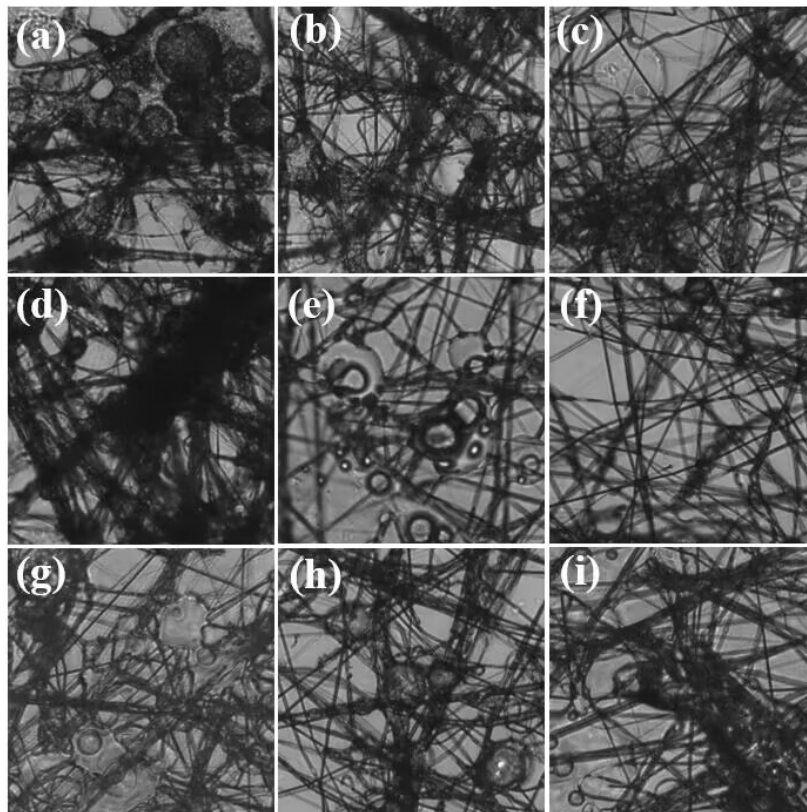

**Fig. S2** Results of orthogonal experiments at 10 cm

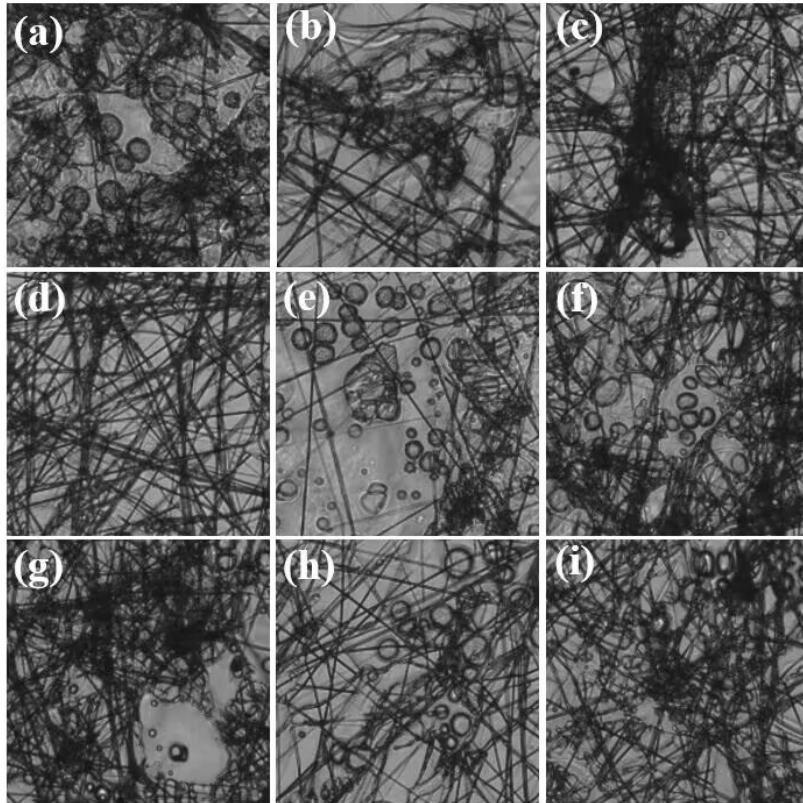

**Fig. S3** Results of orthogonal experiments at 5 cm

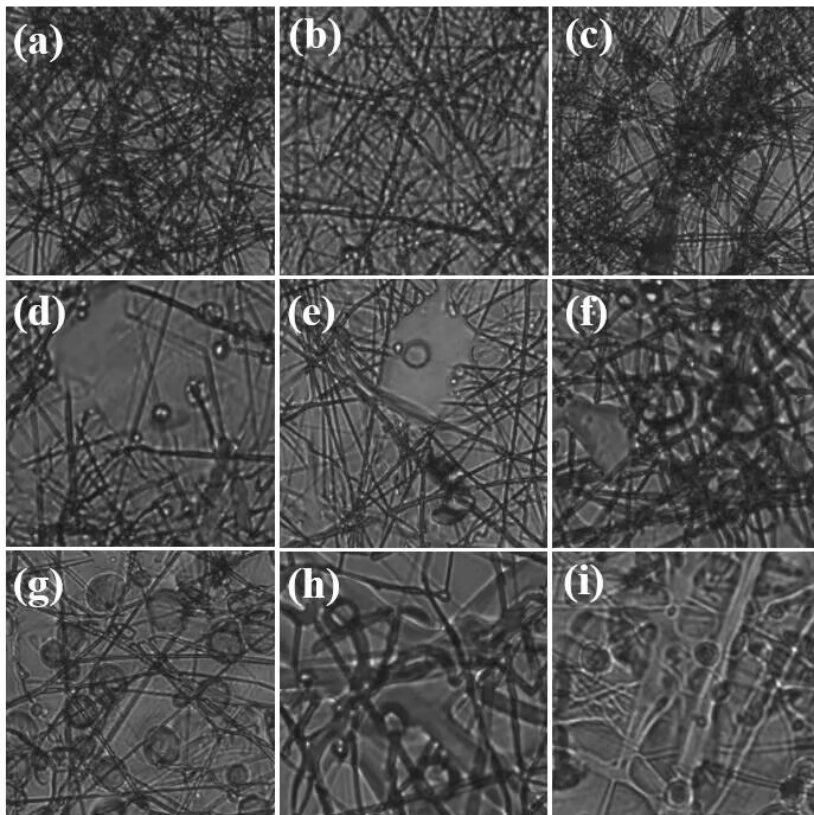

**Fig. S4** Results of orthogonal experiments at 2 cm

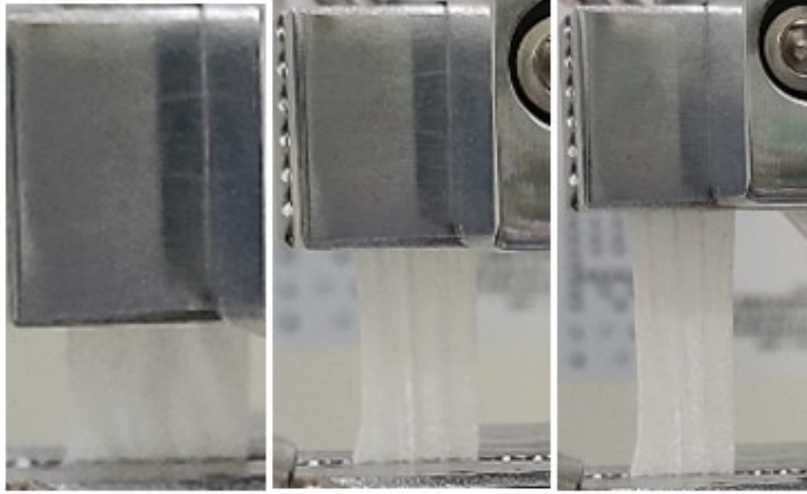

**Fig. S5** A picture of the stretching process of nanofiber membranes.

**Table S4** Comparison of mechanical properties of the nanofiberous membranes fabricated in this work with those reported in literatures

| <b>Main materials</b> | <b>Reference</b> |
|-----------------------|------------------|
| PLGA/PEG/Ag+          | [1]              |
| PLGA/SF/AA            | [2]              |
| PLGA/Ge(7:3)(Dry)     | [3]              |
| PLLA40/GEL60          | [4]              |
| PLLA/POSS             | [5]              |
| PLLA/PEO_HP_CS        | [6]              |
| PLLA-Curc             | [7]              |
| HA/PLGA               | [8]              |
| Res-PLGA              | [9]              |
| GEL/PLGA              | [10]             |
| PLLA/zein-RCSPs       | [11]             |
| PLGA/PLLA             | ↓                |

## Reference

- [1] Daristotle, J. L., Lau, L. W., Erdi, M., Hunter, J., Djoum Jr, A., Srinivasan, P., ... & Kofinas, P. (2020). Sprayable and biodegradable, intrinsically adhesive wound dressing with antimicrobial properties. *Bioengineering & Translational Medicine*, 5(1), e10149.
- [2] Ran, R., Peng, Y., Xiao, L., Wang, Y., Zhang, T., Liu, Z., & Li, Z. (2022). Fabrication of antimicrobial poly (lactic-co-glycolic acid)/silk fibroin/aloe anthraquinone fibrous membranes for potential application of wound healing. *Journal of Applied Polymer Science*, 139(25), e52394.
- [3] Vázquez, N., Sánchez-Arévalo, F., Maciel-Cerda, A., Garnica-Palafox, I., Ontiveros-Tlachi, R., Chaires-Rosas, C., ... & Castell-Rodríguez, A. (2019). Influence of the PLGA/gelatin ratio on the physical, chemical and biological properties of electrospun scaffolds for wound dressings. *Biomedical Materials*, 14(4), 045006.
- [4] Rahimtoroghi, E., & Kasra, M. (2021). Mechanical and cellular characterization of electrospun poly (l-lactic acid)/gelatin yarns with potential as angiogenesis scaffolds. *Iranian Polymer Journal*, 30(6), 623-632.
- [5] Li, W., Wu, D., Zhu, S., Liu, Z., Luo, B., Lu, L., & Zhou, C. (2019). Sustained release of plasmid DNA from PLLA/POSS nanofibers for angiogenic therapy. *Chemical Engineering Journal*, 365, 270-281.
- [6] Mouro, C., Gomes, A. P., & Gouveia, I. C. (2021). Double-layer PLLA/PEO\_Chitosan nanofibrous mats containing *Hypericum perforatum* L. as an effective approach for wound treatment. *Polymers for Advanced Technologies*, 32(4), 1493-1506.
- [7] Barbosa, K. A., Rodrigues, I. C., Tamborlin, L., Luchessi, A. D., Lopes, E. S., & Gabriel, L. P. (2022). Rotary jet-spun curcumin-loaded poly L-lactic acid membranes for wound-healing applications. *Journal of Materials Research and Technology*, 18, 3273-3282.
- [8] Shin, Y. C., Shin, D. M., Lee, E. J., Lee, J. H., Kim, J. E., Song, S. H., ... & Han, D. W. (2016). Hyaluronic acid/PLGA core/shell fiber matrices loaded with EGCG beneficial to diabetic wound healing. *Advanced Healthcare Materials*, 5(23), 3035-3045.
- [9] Ma, W., Zhou, M., Dong, W., Zhao, S., Wang, Y., Yao, J., ... & Zhang, M. (2021). A bi-layered scaffold of a poly (lactic-co-glycolic acid) nanofiber mat and an alginate–gelatin hydrogel for wound healing. *Journal of Materials Chemistry B*, 9(36), 7492-7505.
- [10] Mostofizadeh, M., Ghasemi-Mobarakeh, L., & Zamani, M. (2022). Dual drug release from gelatin/PLGA core–shell fibers for diabetic neuropathic wound healing. *Macromolecular Materials and Engineering*, 307(2), 2100490.
- [11] Zhang, M., Li, X., Li, S., Liu, Y., & Hao, L. (2016). Electrospun poly (l-lactide)/zein nanofiber mats loaded with *Rana chensinensis* skin peptides for wound dressing. *Journal of Materials Science: Materials in Medicine*, 27, 1-12.
